# Supplementary material for: Fabrication of metalosomes (metal containing cationic liposomes) using single chain surfactants as a precursor via formation of inorganic organic hybrids
Source: Royal Society of Chemistry journal article supplement (doi:10.1039/c7cp02908j), 2017-01-01
Supplement: c7cp02908j1.pdf [file c7cp02908j1.pdf]

**Fabrication of metalosomes (metal containing cationic liposomes) using single chain surfactant as precursor via formation of inorganic organic hybrids**

*Preeti Garg<sup>a</sup>, Gurpreet Kaur<sup>\*a</sup> and Ganga Ram Chaudhary<sup>\*a</sup>, Santosh L Gawali<sup>b</sup>, PA Hassan<sup>c</sup>*

*<sup>a</sup>Department of Chemistry and Centre of Advanced studies in Chemistry,  
Panjab University, Chandigarh*

*<sup>b</sup>Homi Bhabha National Institute, Training School Complex, Anushakti nagar,  
Mumbai-400 094, India*

*<sup>c</sup>Chemistry Division, Bhabha Atomic Research Centre, Trombay, Mumbai – 400 085, India*

Corresponding authors

Gurpreet Kaur ([gurpreet14@pu.ac.in](mailto:gurpreet14@pu.ac.in))

Tel: 911722534431

Ganga Ram Chaudhary ([grc22@pu.ac.in](mailto:grc22@pu.ac.in))

Tel: 911722534406

Fax: +91-172-2545074

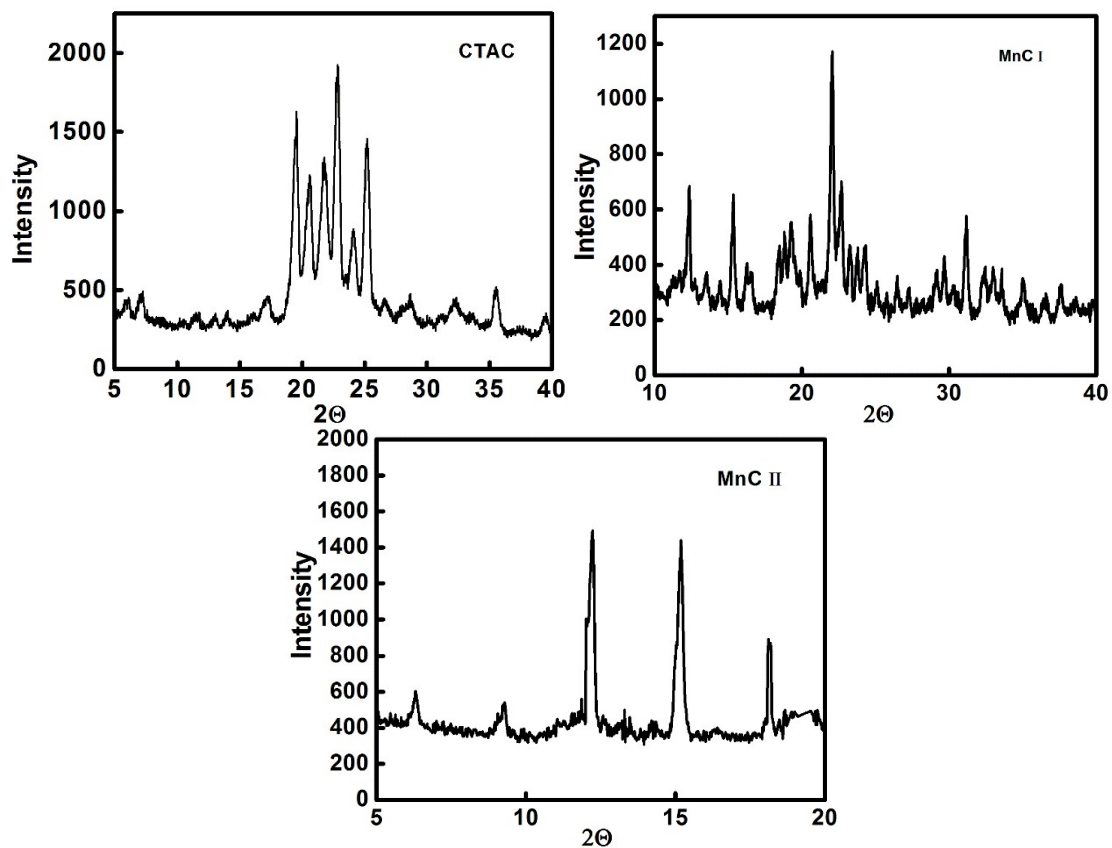

**Figure ES1.** XRD of CTAC, MnC I and MnC II in powder form.

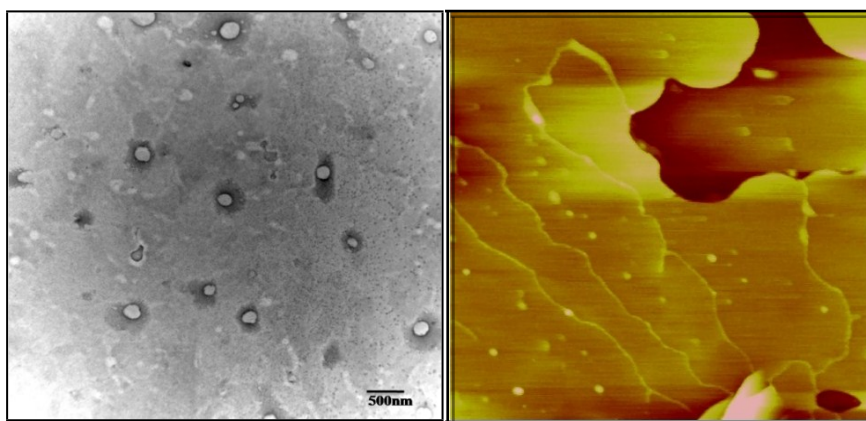

**Figure ES2.** TEM and AFM of reverse vesicle in propanol.

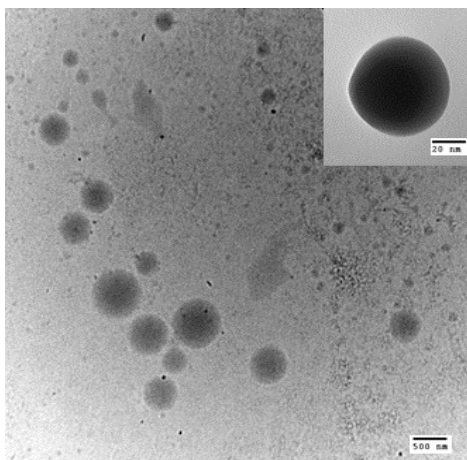

**Figure ES3.** TEM of Mn-somes prepared from MnC-I (single chain metallosurfactant)

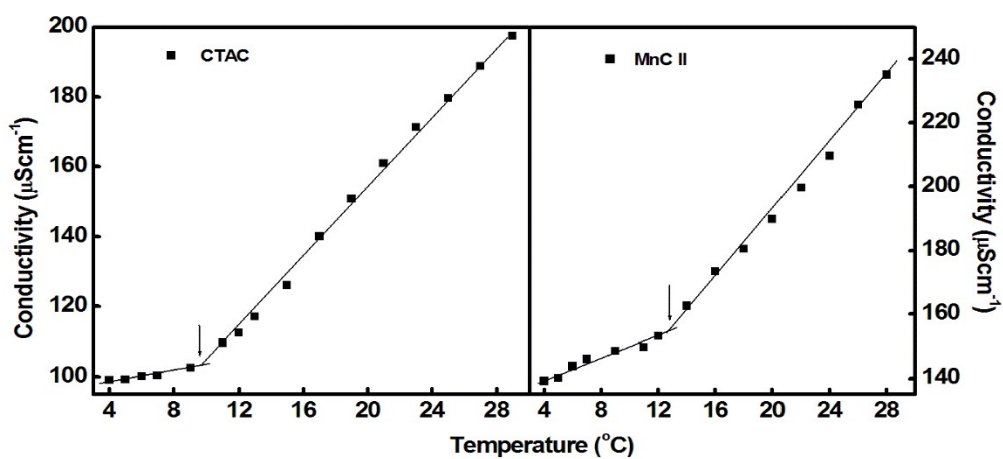

**Figure ES4.** Plots depicting Krafft temperature of CTAC and MnC II.

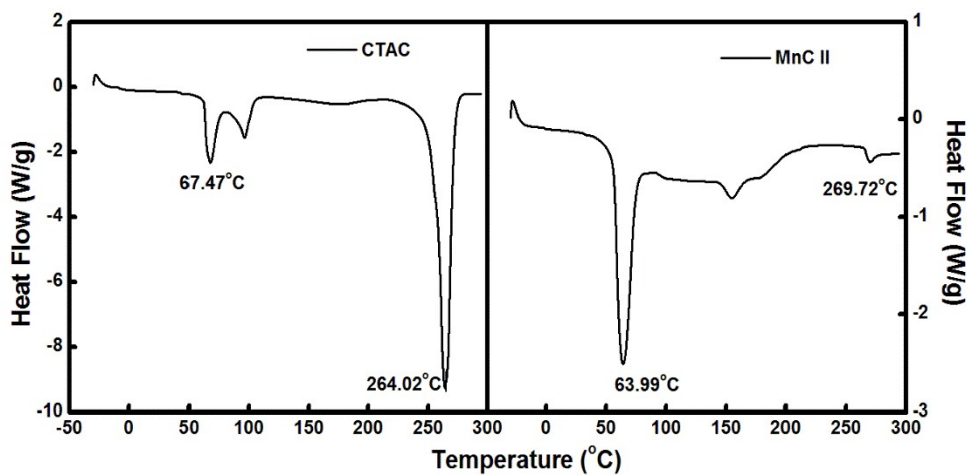

**Figure ES5.** DSC curves of CTAC and MnC II complex.

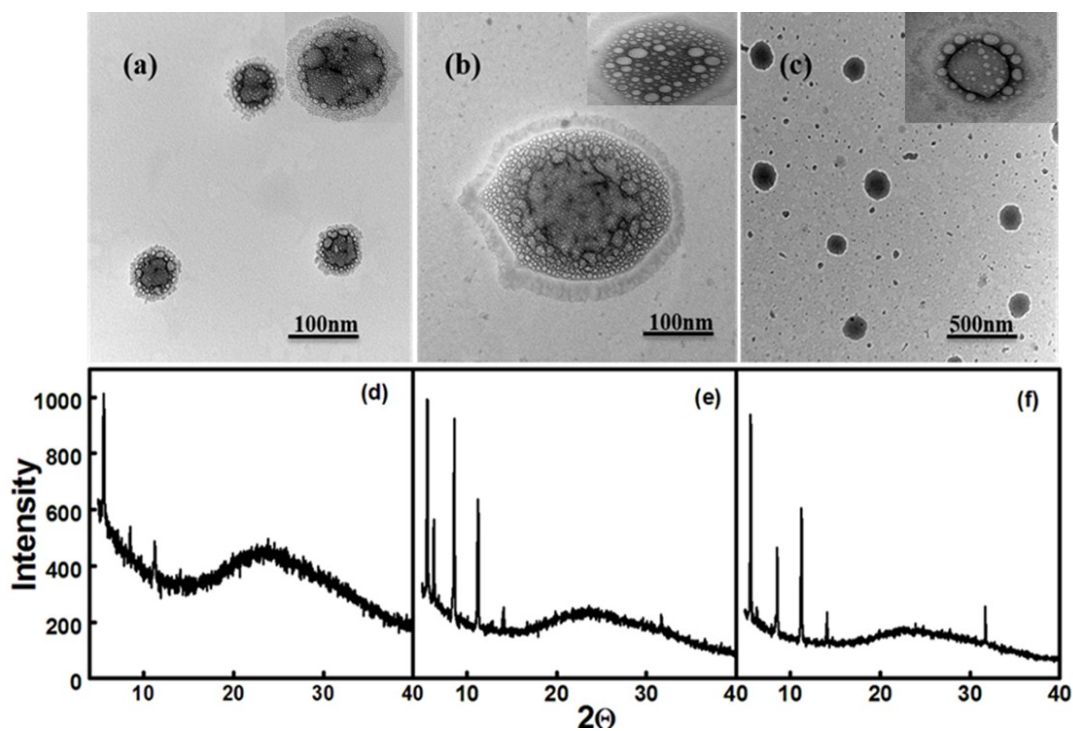

**Figure ES6.** TEM and XRD of vesicle formed without cholesterol in (a) chloroform (b) chloroform + propanol (c) propanol.

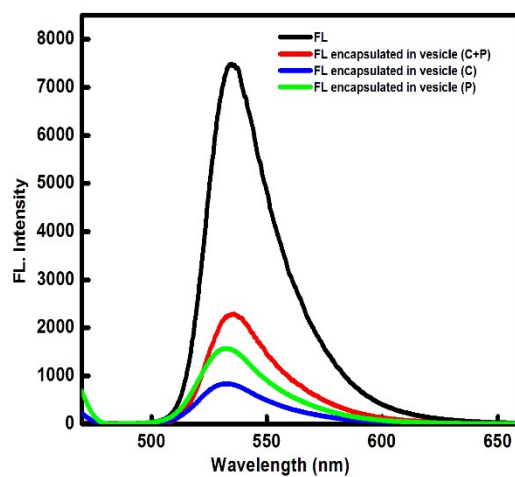

**Figure ES7.** Emission spectra of FL in Mn-somes system.

**Table ES1.** Hydrodynamic diameter with PDI of Mn-somes in different solvent with and without cholesterol

| Vesicle of MnC II          | Hydrodynamic diameter (PDI) |                     |                     |                     |
|----------------------------|-----------------------------|---------------------|---------------------|---------------------|
|                            | 1 <sup>st</sup> day         | 3 <sup>rd</sup> day | 5 <sup>th</sup> day | 7 <sup>th</sup> day |
| Chloroform                 | 223.5 (0.110)               | 337.1 (0.506)       | 344.8 (0.750)       | 390.1 (0.908)       |
| Propanol                   | 314.1 (0.257)               | 383.6 (0.321)       | 450.2 (0.456)       | 478.3 (0.268)       |
| Chloroform +Propanol       | 450.6 (0.509)               | 443.7 (0.176)       | 468.5 (0.575)       | 486.2 (0.580)       |
| <b>Without Cholesterol</b> |                             |                     |                     |                     |
| Chloroform                 | 400.4 (0.299)               | 569.1 (0.851)       | 789.8 (0.938)       | 901.6(0.935)        |
| Propanol                   | 459.2 (0.364)               | 550.1 (0.431)       | 634.2 (0.951)       | 1089 (0.924)        |
| Chloroform +Propanol       | 520.7 (0.276)               | 781.1 (0.045)       | 891 (0.911)         | 1086 (0.792)        |
